# Supplementary material
Source: Springer Nature journal article supplement (https://www.springermedizin.de/resource/supplementary/13033_2014_199_MOESM2_ESM.pdf/9652044)

**a****Percentages of correct answers**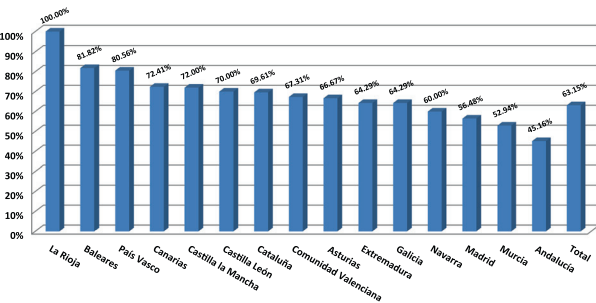**Percentage of correct answers**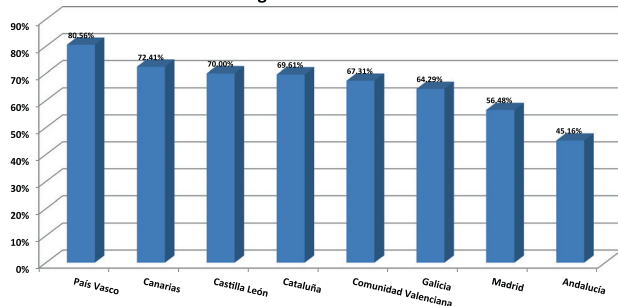**b****Percentage of correct answers**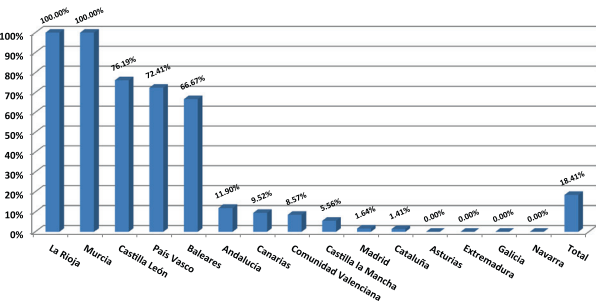**Percentage of correct answers**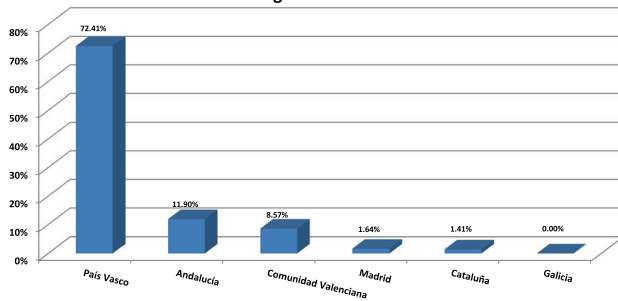

Supplement: MOESM2 [file 9652044]
